# Supplementary material for: Targeted inhibition of ATP synthase subunit c by pp10-loaded inhalable albumin nanoparticles ameliorates airway inflammation in asthma
Source: Research Square preprint supplement (doi:10.21203/rs.3.rs-8621332/v1), 2026-01-23

Western blots

Figure 5A Example of original western blot for three repeats.


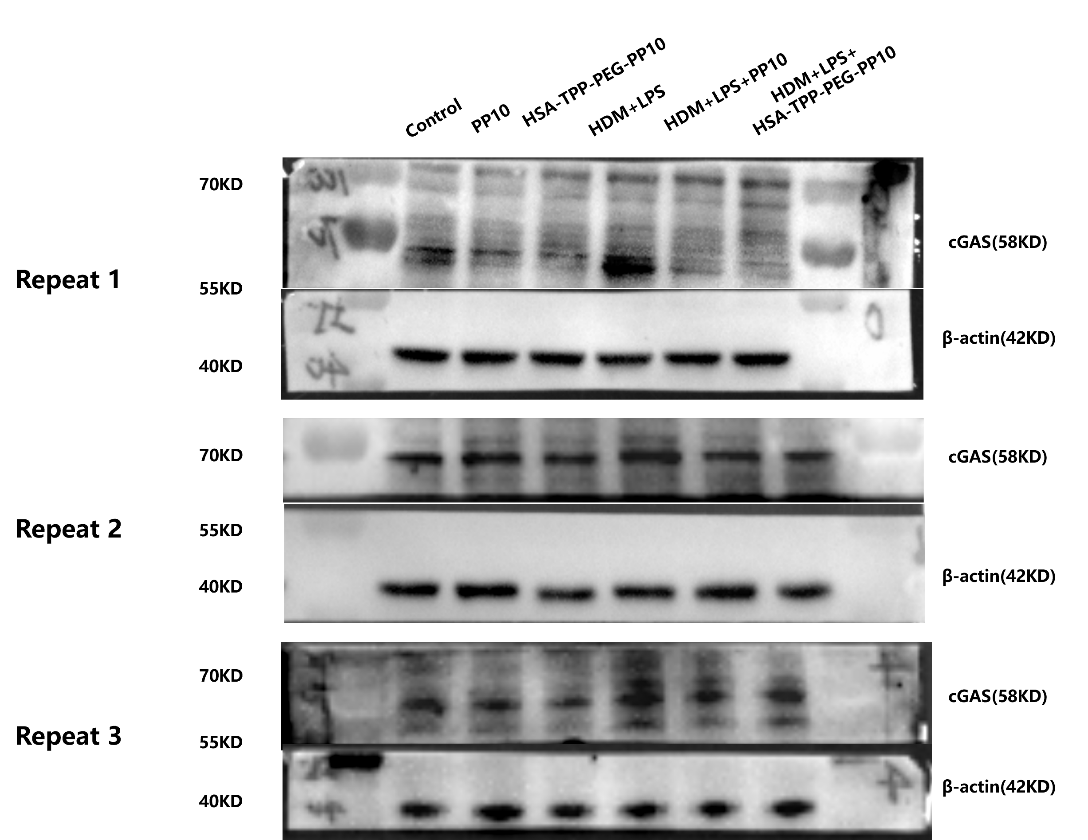


Figure 5C Example of original western blot for three repeats.


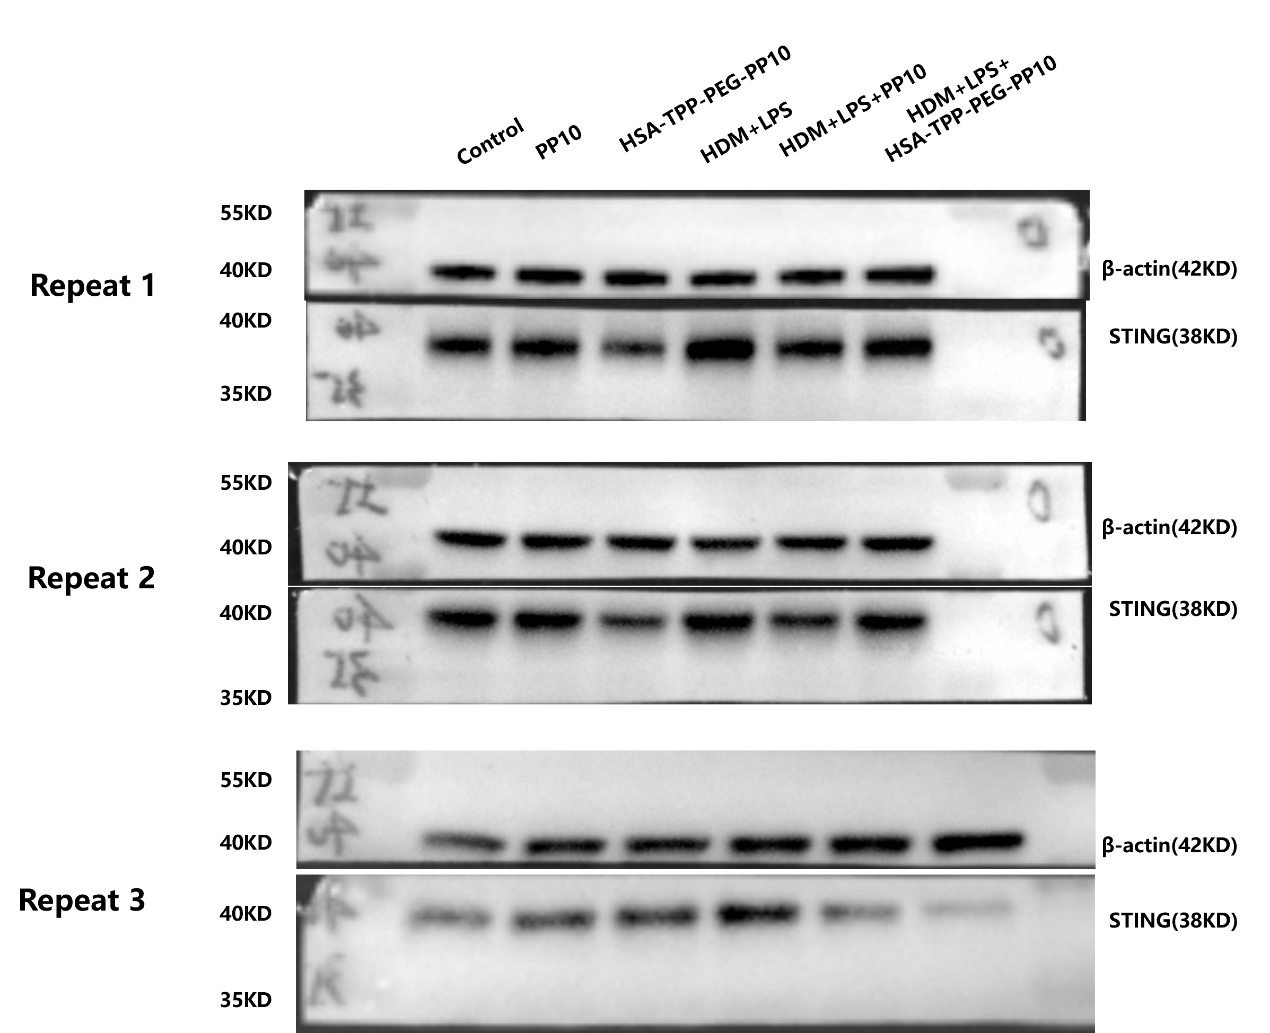


Figure 8E Example of original western blot for five repeats.


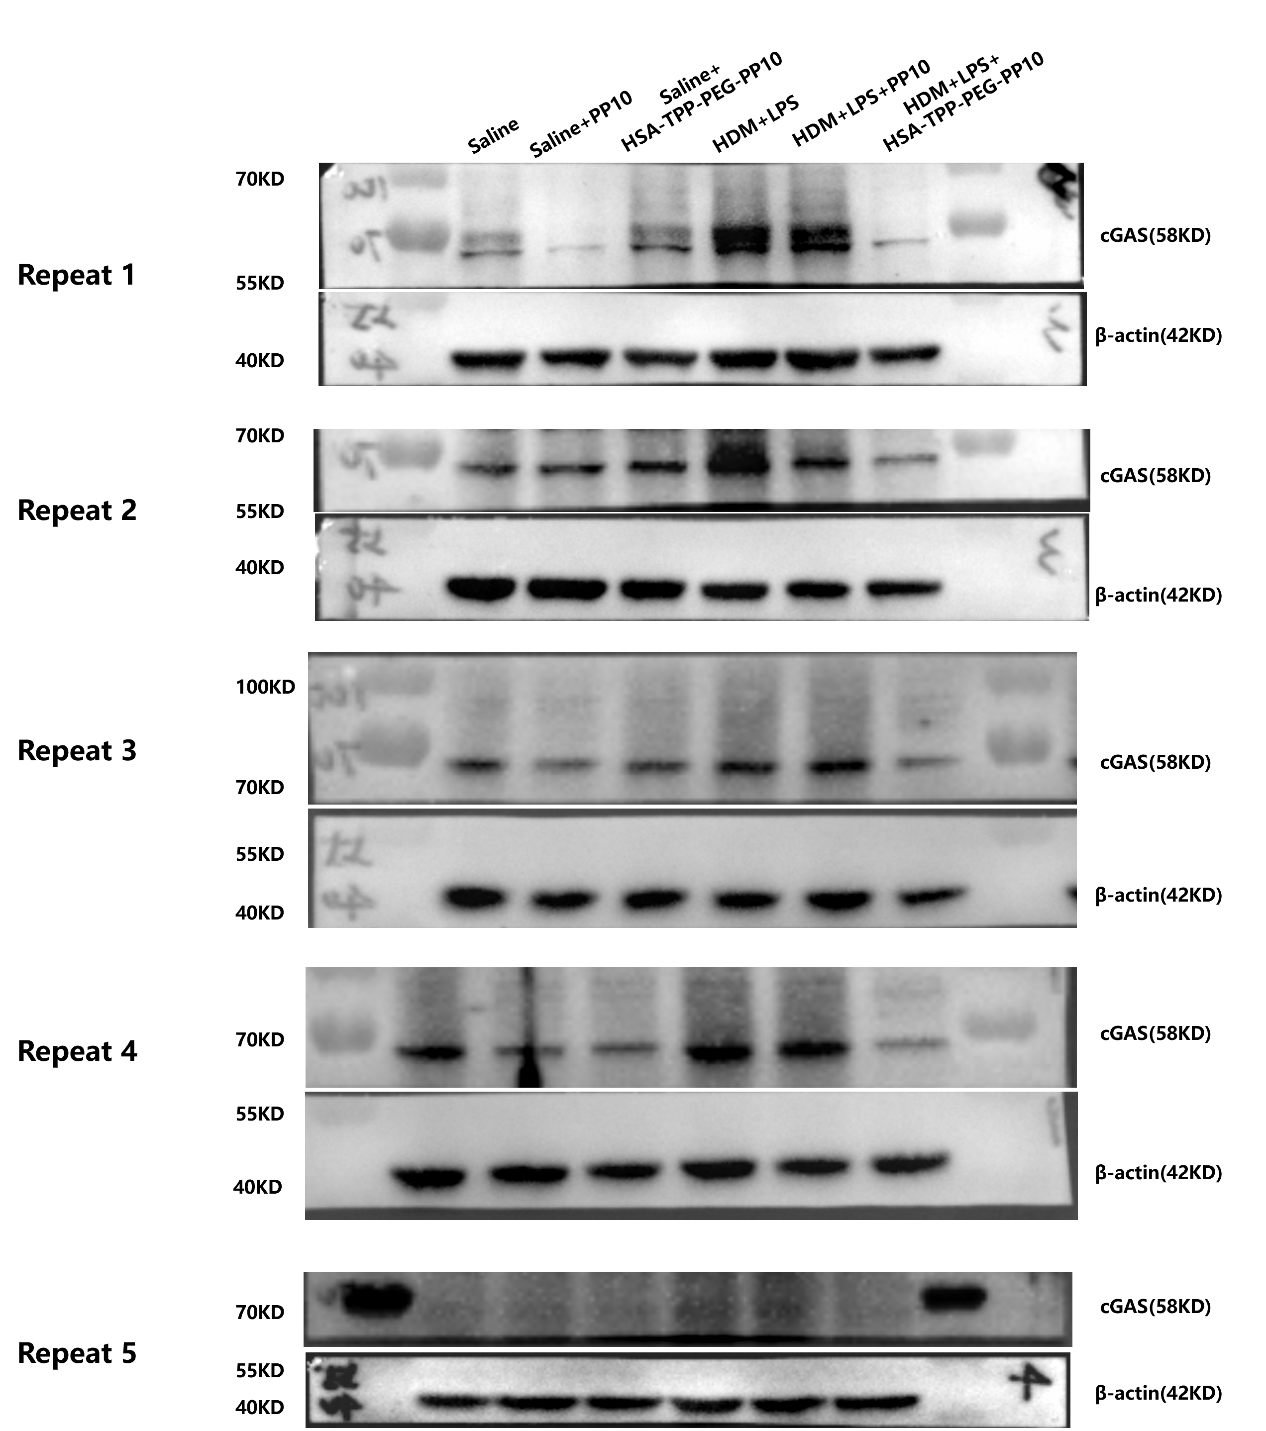


Figure 8F Example of original western blot for five repeats.


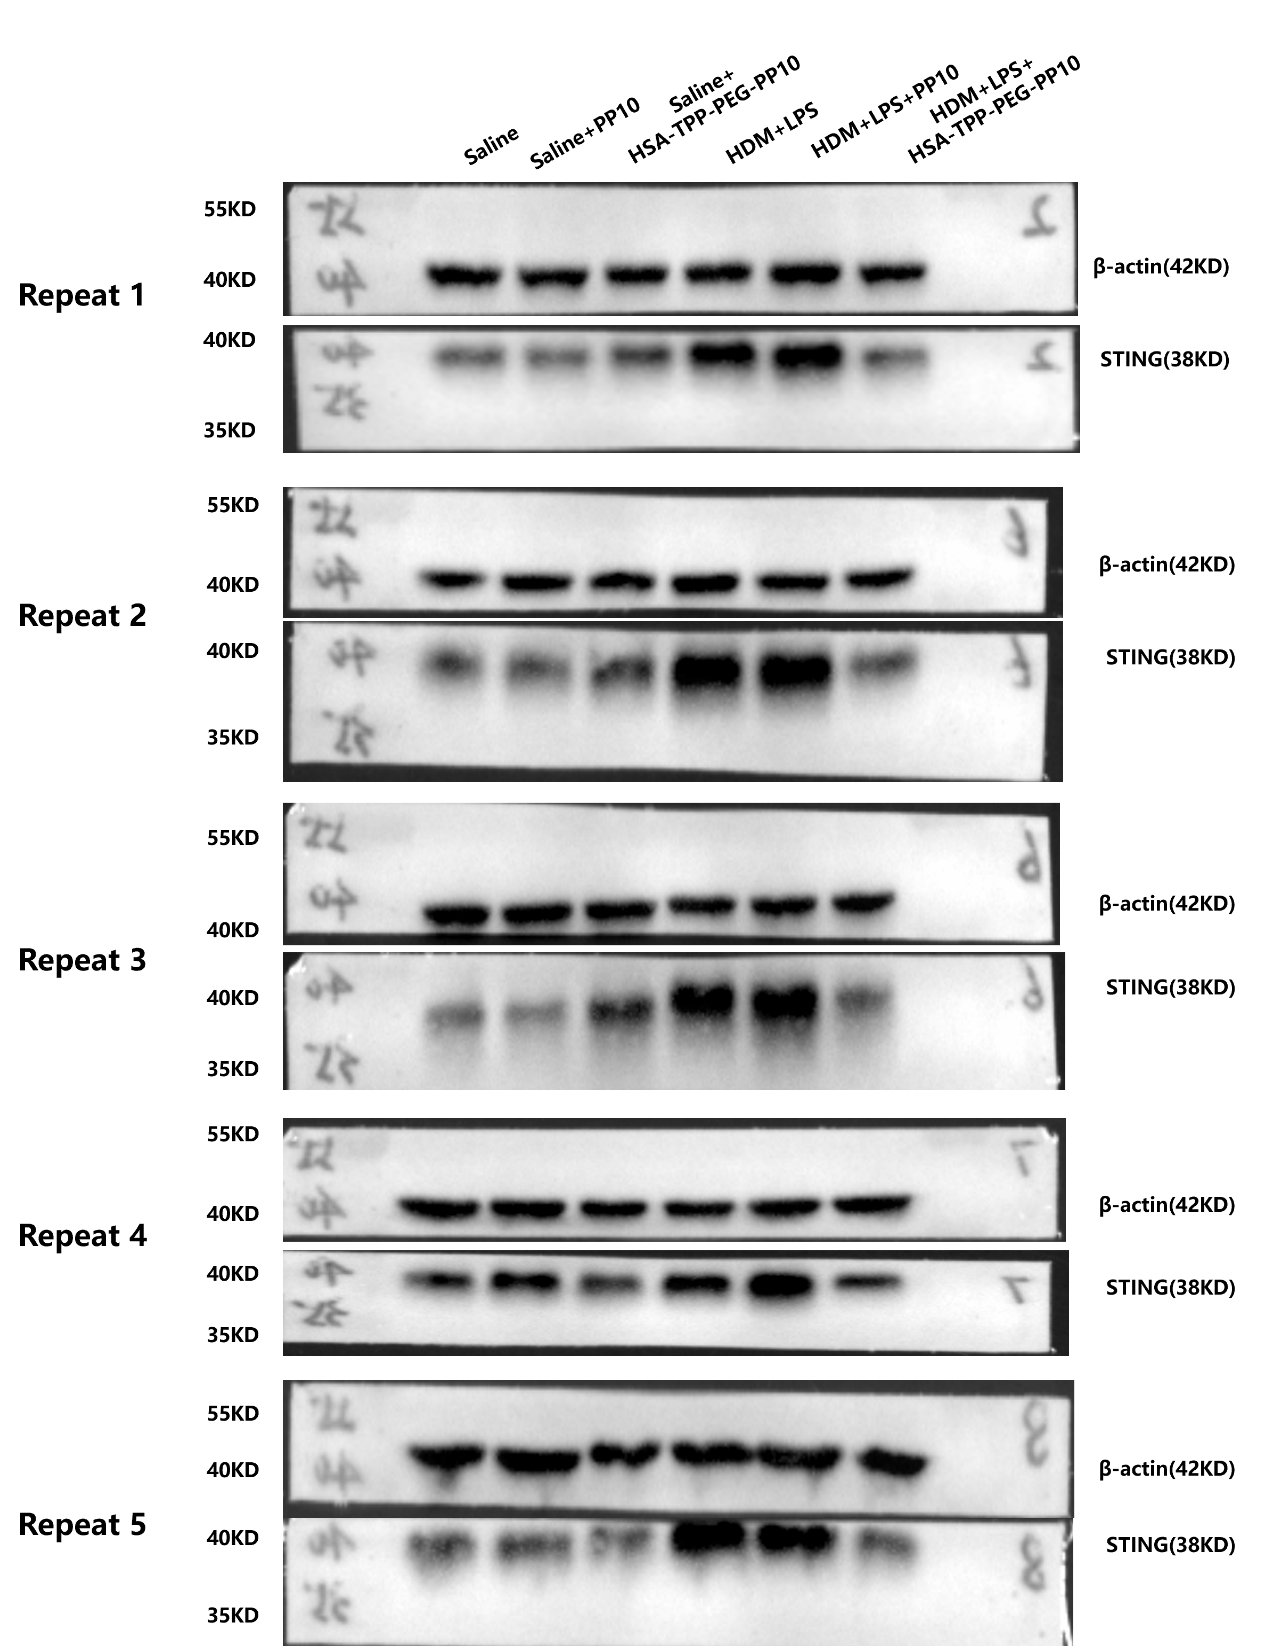


Figure S1E Example of original western blot for five repeats.


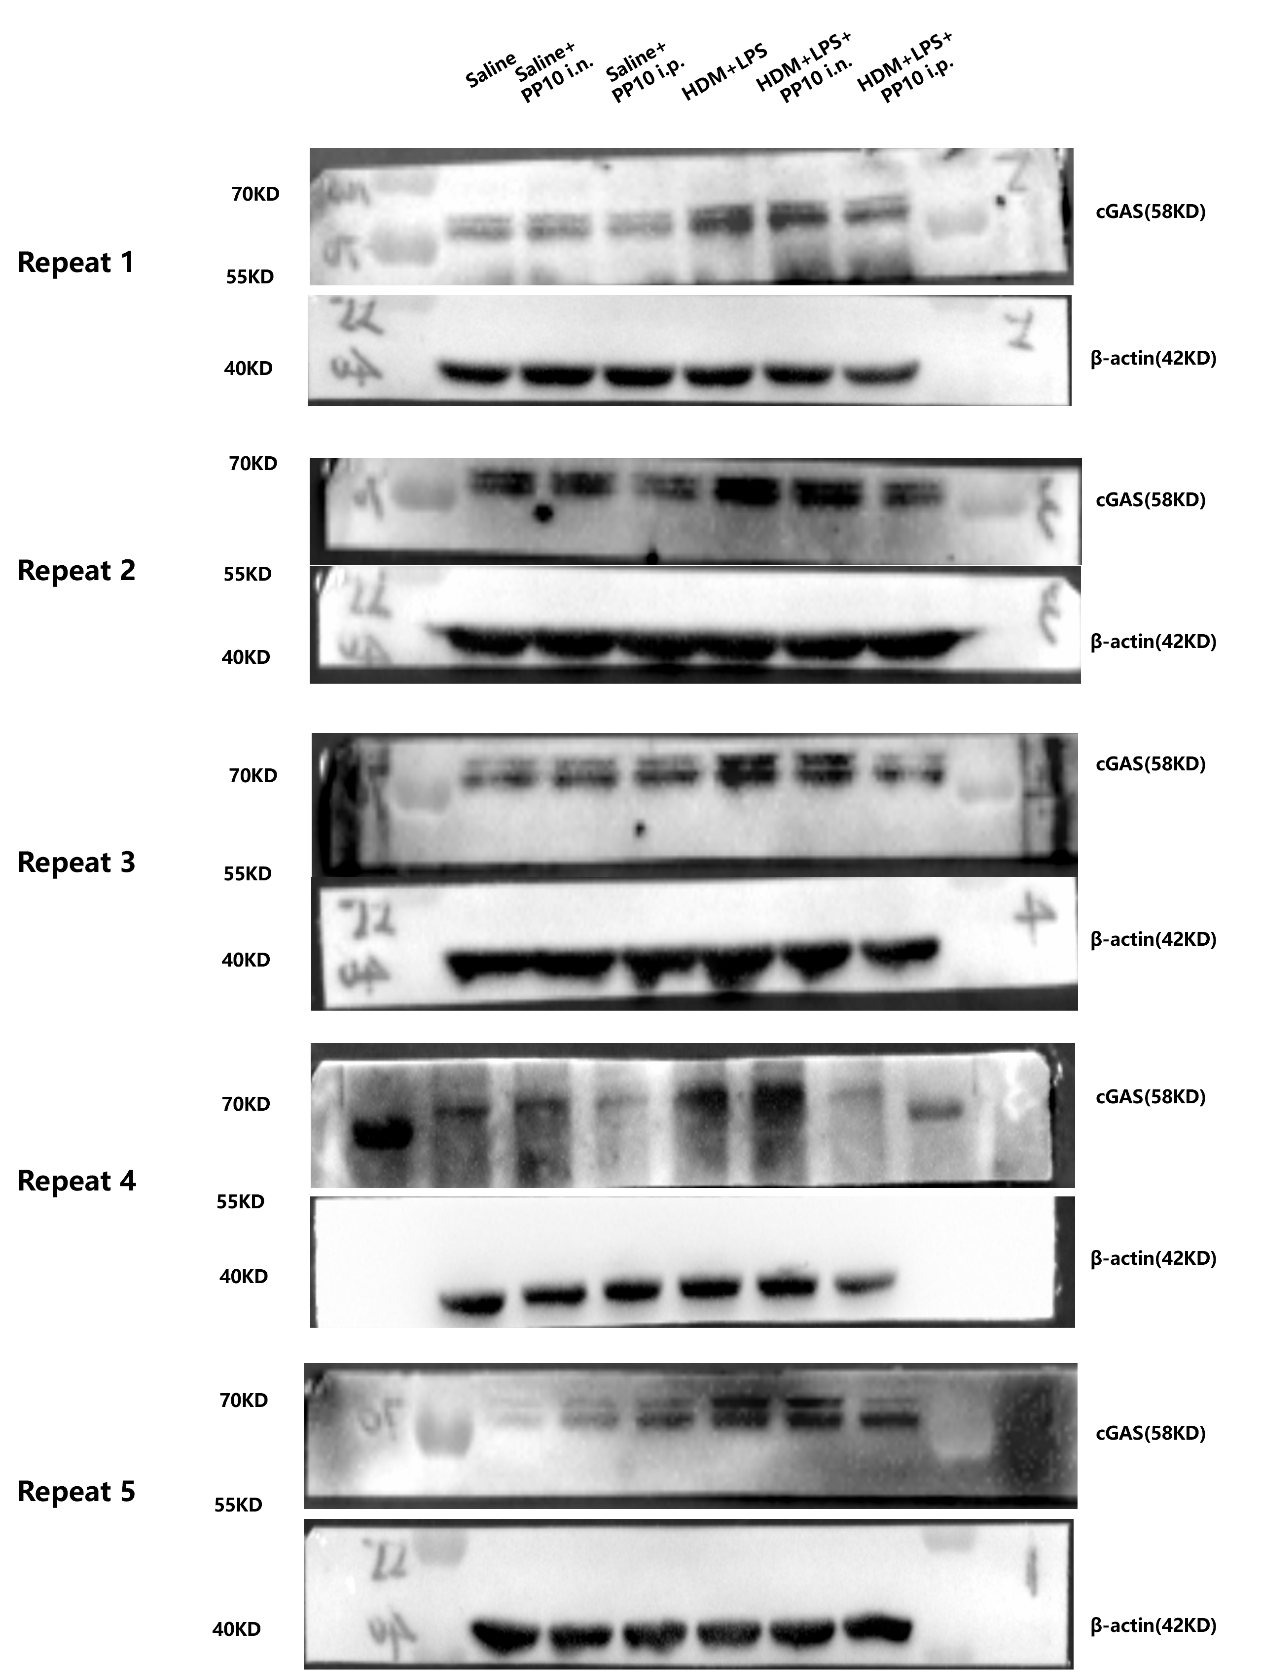


Figure S1F Example of original western blot for five repeats.


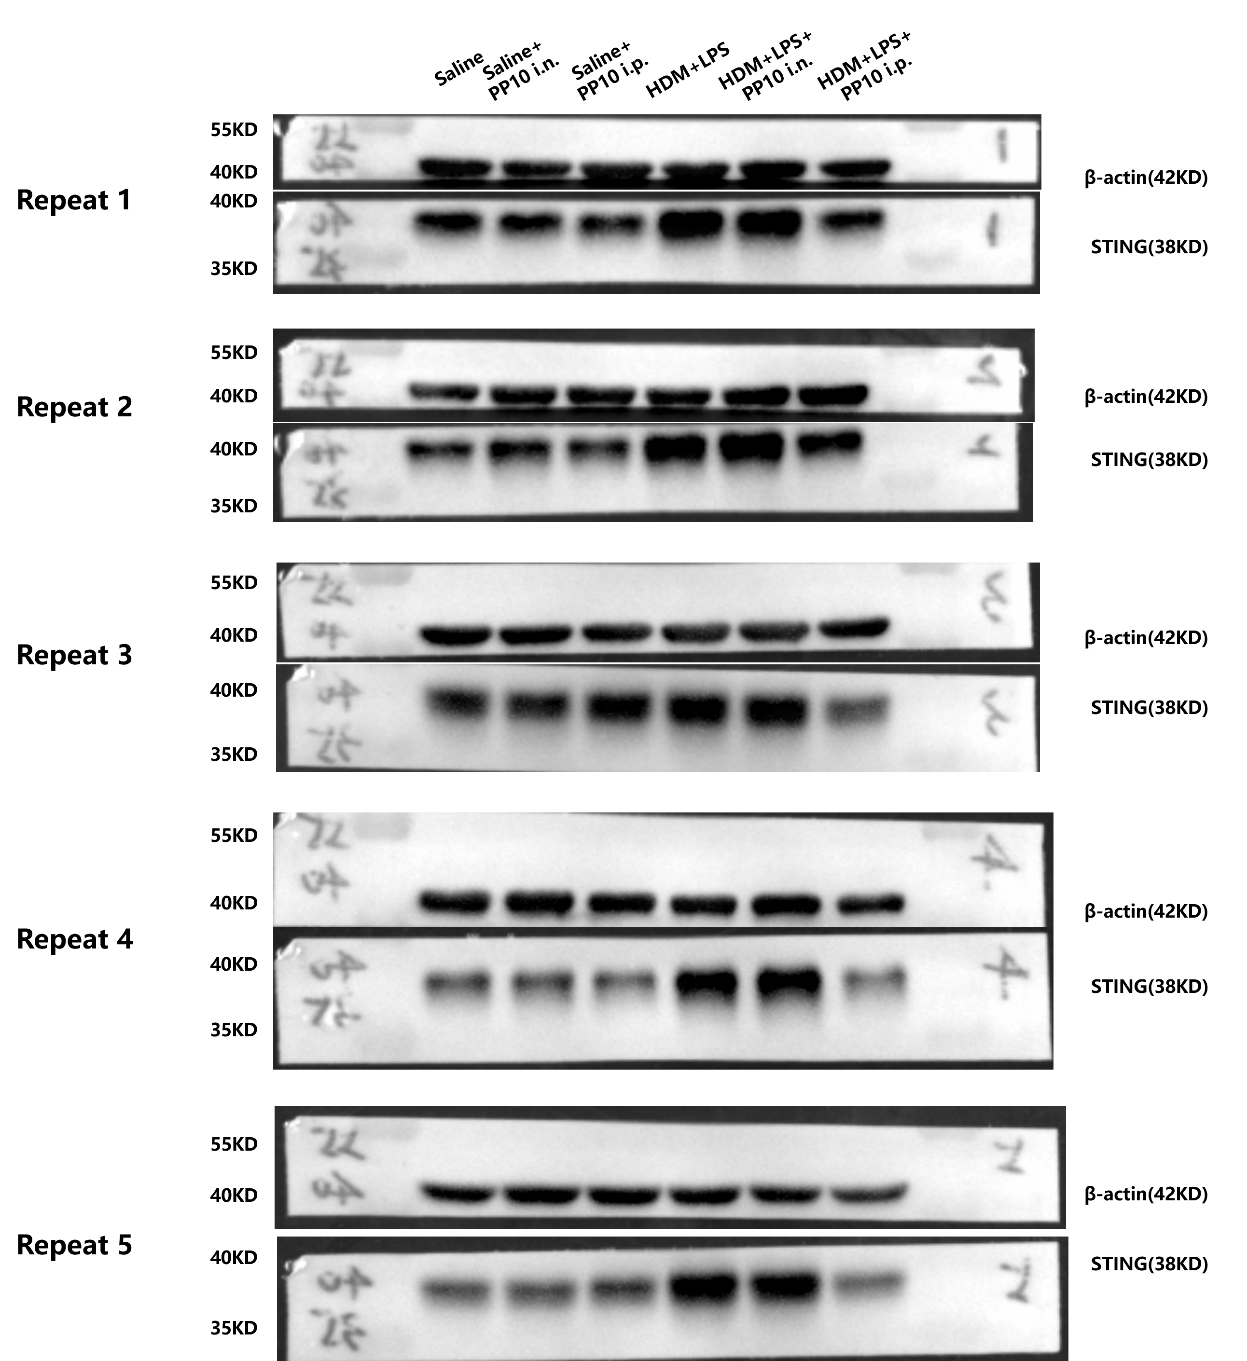

Supplement: Supplementary file 1 [file 6c05ef169addd313369ff971.docx]
